1 **Comparison of Neutralizing Antibody Titers Elicited by mRNA and**  
2 **Adenoviral Vector Vaccine against SARS-CoV-2 Variants**

3

4

5 Takuya Tada<sup>1,4</sup>, Hao Zhou<sup>1,4</sup>, Marie I. Samanovic<sup>2,3,4</sup>, Belinda M. Dcosta<sup>1</sup>, Amber

6 Cornelius<sup>2,3</sup>, Mark J. Mulligan<sup>1,2,3,5</sup> and Nathaniel R. Landau<sup>1,5\*\*</sup>

7

8 **Affiliation:**

9 <sup>1</sup>Department of Microbiology, NYU Grossman School of Medicine, New York, NY, USA.

10 <sup>2</sup>Department of Medicine, NYU Grossman School of Medicine, New York, NY, USA.

11 <sup>3</sup>NYU Langone Vaccine Center, NYU Grossman School of Medicine, New York, NY, USA.

12

13 <sup>4</sup>Contributed equally to this study

14 <sup>5</sup>Contributed equally to this study

15

16 **\*\*Corresponding author:**

17 Nathaniel R. Landau, Ph.D.

18 NYU Grossman School of Medicine

19 430 East 29th Street, Alexandria West Building, Rm 509, New York, NY 10016

20 Email: [nathaniel.landau@med.nyu.edu](mailto:nathaniel.landau@med.nyu.edu)

21 Phone: (212) 263-9197

22

## 23 **Abstract**

24 The increasing prevalence of SARS-CoV-2 variants has raised concerns regarding  
25 possible decreases in vaccine efficacy. Here, neutralizing antibody titers elicited by  
26 mRNA-based and an adenoviral vector-based vaccine against variant pseudotyped  
27 viruses were compared. BNT162b2 and mRNA-1273-elicited antibodies showed modest  
28 neutralization resistance against Beta, Delta, Delta plus and Lambda variants whereas  
29 Ad26.COV2.S-elicited antibodies from a significant fraction of vaccinated individuals were  
30 of low neutralizing titer ( $IC_{50} < 50$ ). The data underscore the importance of surveillance for  
31 breakthrough infections that result in severe COVID-19 and suggest the benefit of a  
32 second immunization following Ad26.COV2.S to increase protection against the variants.

33 Severe acute respiratory syndrome coronavirus 2 (SARS-CoV-2) vaccines from two  
34 vaccine platforms have been granted U.S. Food and Drug Administration (FDA)  
35 Emergency Use Authorization: mRNA-based (Pfizer and Moderna) and adenoviral  
36 vector-based (Johnson & Johnson (J&J)), all of which have been shown to be highly  
37 effective. The mRNA-based vaccines were 94-95% effective in preventing COVID-19<sup>1</sup>  
38 whereas the adenoviral vector-based J&J vaccine had 66.9% efficacy in preventing  
39 moderate to severe disease<sup>2</sup>. However, the ongoing emergence of highly transmissible  
40 variants with mutations in the spike protein raises concerns regarding possible decreases  
41 in vaccine effectiveness due to spike protein antigenic variability.

42  
43 SARS-CoV-2 variants have been classified by the World Health Organization (WHO)  
44 based on increased transmissibility and/or pathogenicity as variants of concern (VOC;  
45 Alpha (B.1.1.7), Beta (B.1.351), Gamma (B.1.1.248) and Delta (B.1.617.2) and variants  
46 of interest (VOI; Epsilon (B.1.427/B.1.429), Iota (B.1.526), and Delta plus (AY.1) and  
47 Lambda (C.37)<sup>3</sup>. The increased transmissibility and/or pathogenicity of the variants is due,  
48 at least in part, to mutations in the spike protein RBD that increase its affinity for ACE2  
49 on target cells. Mutations in the Beta, Gamma and Delta variant spike RBDs have been  
50 shown to cause partial resistance to neutralization by the serum antibodies of vaccinated  
51 and convalescent individuals and therapeutic monoclonal antibodies<sup>4-11</sup>.

52  
53 This study compared the neutralization titers of serum antibodies from individuals  
54 immunized with three U.S. FDA Emergency use authorization vaccines (BNT162b2,  
55 mRNA-1273 and Ad26.COV2.S) against viruses with the VOC and Lambda spike proteins.

56 The study groups were controlled for age, clinical co-morbidity, history of pre-vaccination  
57 infection and sera were collected on similar days post-vaccination. The results  
58 demonstrate a high level of cross-neutralization by antibodies elicited by BNT162b2 and  
59 mRNA-1273 on the variants but significantly decreased neutralization by those elicited by  
60 the single dose Ad26.COVS.S.

61

62 **Variant pseudotyped lentiviruses.** The Delta plus spike contains K417N, L452R and  
63 T478K in the RBD (**Figure S1A**). The Lambda spike protein contains novel L452Q and  
64 F490S mutations in the RBD (**Figure S1A**). We previously described the production of  
65 lentiviruses pseudotyped by the Alpha, Beta, Gamma and Delta spike proteins and here  
66 report the generation of pseudotypes with the Delta plus and Lambda variant spike  
67 proteins and the individual constituent mutations. The variant spike proteins were well  
68 expressed, proteolytically processed and incorporated into lentiviral virions at a level  
69 similar to that of the parental D614G spike protein in the producer cells and virions (**Figure**  
70 **S1B**). The measurement of neutralizing antibody titers with such pseudotypes has been  
71 shown to yield results consistent with those obtained with the live virus plaque reduction  
72 neutralization test<sup>12</sup>.

73  
74 **Reduced sensitivity of virus with variant spikes to neutralization by convalescent**  
75 **sera and mRNA vaccine-elicited antibodies.** Sera from individuals who had been  
76 infected prior to the emergence of the variants (collected 32-57 days post symptom onset)  
77 neutralized virus with the D614G spike protein with an average IC<sub>50</sub> titer of 346 and  
78 neutralized the Alpha variant with a similar titer (IC<sub>50</sub> of 305). Neutralizing titers for Beta,  
79 Delta, Delta plus and Lambda variants were decreased 3.2-4.9-fold relative to D614G,  
80 indicative of a modest resistance to neutralization (**Figure 1A, Table S1**). The sera of  
81 individuals vaccinated with BNT162b2 and mRNA-1273 that were collected 7-days post-  
82 second injection – a peak antibody response timepoint - neutralized virus with the D614G  
83 spike with significantly higher titer (1835 and 1594, respectively) relative to the  
84 convalescent sera, and the antibodies cross-reacted on the variants with a modest 2.5-

85 4.0-fold decrease in titer (**Figure 1A**). The resistance of the Beta variant was attributed  
86 to the E484K mutation whereas resistance of the Delta variant was attributed to the L452R  
87 mutation (**Figure S2**). The resistance of the lambda variant was attributed to both the  
88 L452Q and F490S mutations (**Figure S2**).

89

#### 90 **Resistance of viruses with variant spike proteins to neutralization by Ad26.COVS-**

91 **elicited antibodies.** We next compared the neutralizing titers of antibodies elicited by the

92 BNT162b2 and mRNA-1273 mRNA vaccines with that of the Ad26.COVS adenoviral

93 vector-based vaccine. The sera analyzed were collected from individuals at similar time-

94 points post-final injection, on average (90 days for BNT162b2, 80 days for mRNA-1273

95 and 82 days for Ad26.COVS; **Table S2**) and from individuals of similar age and with

96 similar clinical co-morbidities (**Table S2**). None of the participants had a history of COVID-

97 19 pre- or post-vaccination and all were negative for antibodies against the SARS-CoV-

98 2 N protein (**Table S2**). The results showed that BNT162b2 sera neutralized virus with

99 the D614G and Alpha spikes with an average titer of 695 and 626. Compared to the

100 D614G, the neutralizing titer against Beta was decreased 6.1-fold and Delta plus was

101 decreased 2.7-fold. Results for the mRNA-1273 vaccine were similar with a 3.3-fold

102 decrease in neutralizing titer for Delta plus and 4.6-fold for Beta. Ad26.COVS sera

103 neutralized D614G and Alpha variants with average IC<sub>50</sub> titers of 221 and 232,

104 respectively, and neutralized the variants with titers that were decreased by 5.4-fold for

105 Delta plus to 6.7-fold for the Beta variant as compared to D614G (**Figure 1B**).

106 Presentation of the data grouped by variant shows the decreased neutralizing titers

107 against the variants by sera of the Ad26.COVS-vaccinated individuals (**Figure 1C**).

108  
109 **The L452R/Q mutation of the Delta plus and Lambda spike proteins increases**  
110 **infectivity and affinity for ACE2.** Measurement of the infectivity of the pseudotyped  
111 viruses, normalized for particle number, showed that the Lambda variant spike protein  
112 increased viral infectivity by 2-fold (**Figure 2A**), an increase equivalent to that of the Delta  
113 and Delta plus variants. The increase was due to the L452Q mutation and was similar to  
114 that of the L452R found in the Delta and Delta plus variants. The other mutations ( $\Delta$ 246-  
115 252, G75V-T76I, F490S and T859N) had no significant effect on infectivity (**Figure 2A**).  
116 Measurement of the relative affinity of the variant spike proteins for ACE2 using sACE2  
117 neutralization assay showed that variant spikes had a 3-fold increase in sACE2 binding  
118 (**Figure 2B**). This increase was confirmed in a virion:ACE2 binding assay (**Figure 2C**).  
119 The increase was caused by the L452R and L452Q mutation and were similar to the  
120 increase caused by the N501Y mutation<sup>13,14</sup>.

121  
122 **Neutralization by REGN10933 and REGN10987.** Analysis of REGN10933 and  
123 REGN10987 monoclonal antibodies that constitute the REGN-COV2 therapy showed that  
124 REGN10933 had decreased activity against the Beta variant spike which resulted in a  
125 127-fold decrease in neutralizing titer. REGN10933 also had decreased activity against  
126 the Delta plus variant which resulted in a 92.7-fold decrease in neutralizing titer. The  
127 resistance to REGN10933 was attributed to K417N and E484K (**Figure S3**). REGN10933  
128 neutralized virus with the Delta variant spike with a 12-fold decrease in titer which had  
129 only a minor effect on the activity of the cocktail. REGN10987 showed a minor reduction  
130 in neutralizing titer of virus with the Beta, Delta, Delta plus and Lambda variant spikes but

131 this had little effect on neutralization of the virus by the cocktail (**Figure 2D**). The  
132 resistance of variants to REGN10987 was attributed to the L452R/Q (**Figure S3**).  
133



## 134 Discussion

135 Several reports have shown partial resistance of SARS-CoV-2 VOCs to vaccine-elicited  
136 antibodies<sup>4-11</sup>. The data shown here extend those findings to the Delta plus and Lambda  
137 variants. Delta plus and Lambda, VOIs, both displayed a degree of resistance to mRNA  
138 vaccine-elicited antibodies similar to that of the Beta and Delta variants. In sera collected  
139 ~3 months post-second immunization, BNT162b2 and mRNA-1273 mRNA vaccine-  
140 elicited antibodies neutralized the variants with a modest 3-fold average decrease in titer  
141 resulting in an average IC<sub>50</sub> of about 1:600, a titer that is greater than that of convalescent  
142 sera and likely, in combination with post-vaccination T- and B-cell memory responses, to  
143 provide durable protection. Ad26.COVS vaccination-elicited neutralizing antibodies  
144 showed a more pronounced decrease in neutralizing titer against the variants, raising the  
145 potential for decreased protection against the VOCs and the Lambda variant. Vaccination  
146 with Ad26.COVS resulted in IC<sub>50</sub> titers against Beta, Delta, Delta plus and Lambda  
147 variants that decreased 5-7-fold, resulting in mean neutralizing antibody titers of 33, 30,  
148 41, and 36 against viruses with the Beta, Delta, Delta plus and Lambda variant spikes,  
149 respectively, which according to mathematical modeling, could result in decreased  
150 protection against infection<sup>15</sup>. Modeling predicts that 50% protection from infection is  
151 provided by a titer that is 20% that of the mean convalescent titer. In this study, given a  
152 mean convalescent titer of 346 (**Table S1**), 50% protection would correspond to an IC<sub>50</sub>  
153 of 69. The titer required to protect against severe disease was shown to be 3% that of the  
154 mean titer of convalescent sera which in this study corresponds to a titer of 10. In a  
155 published report of phase 3 trial data, a single dose of Ad26.COVS, 28 days post  
156 administration, provided 64.0% protection against moderate to severe disease and 81.7%

157 against severe-critical COVID-19 in a country where 95% of circulating SARS-CoV-2 was  
158 the Beta variant<sup>2</sup>. The authors considered possible roles for non-neutralizing antibody Fc-  
159 mediated effector functions and the role of the T cell response in maintaining protection  
160 against the partially neutralizing antibody-resistant Beta variant.

161  
162 The data reported here differ somewhat from those reported by Barouch *et al.* and  
163 Jongeneelen *et al.* who found that Ad26.COVS-elicited antibody titers were mostly  
164 maintained against the variants<sup>16,17</sup>. In addition, Alter *et al.* reported a 5-fold decrease in  
165 neutralizing antibody titer against Beta and 3.3-fold decrease against the Gamma variant  
166 by the sera from Ad26.COVS vaccination<sup>18</sup> which were less pronounced than those  
167 reported here. While the studies used similar assays to measure antibody neutralization  
168 and analyzed sera collected at a similar time-point post-immunization, it is possible that  
169 differences in the study populations accounted for the experimental differences.

170  
171 Several recent studies have shown that boosting a single immunization of the  
172 ChAdOx1nCoV-19 adenoviral vector vaccine with BNT162b2 resulted in high neutralizing  
173 titer against the VOCs<sup>19-21</sup>. It is likely that neutralizing antibody titers against the VOCs  
174 elicited by the single shot Ad26.COVS could similarly be improved by boosting with a  
175 second immunization or by a heterologous boost with one of the mRNA vaccines. While  
176 a single dose vaccination has advantages, the benefit provided by a second immunization  
177 may be well worth the inconvenience.

178

179 The data presented here emphasize the importance of surveillance for breakthrough  
180 infections with the increased prevalence of highly transmissible variants. If an increase in  
181 breakthrough infections accompanied by severe COVID-19 is found following adenovirus  
182 vector or mRNA vaccination, this would provide a rationale for public health policy-makers  
183 and manufacturers to consider booster immunizations that would increase protection  
184 against the VOCs and Lambda variant. As such a need is not currently evident, the public  
185 health apparatus should focus on primary immunization in the U.S. and globally.

186

187

188 **Methods**

189 **Clinical Samples**

190 Convalescent sera were collected 32-57 days post-symptom onset. For the early time-  
191 point, BNT162b2 and Moderna-vaccinated sera were collected on day 28 and 35,  
192 respectively, 7 days post-second immunization. For the later time-point, BNT162b2-  
193 vaccinated sera were on average collected 90 days post-second immunization and  
194 mRNA-1273-vaccinated sera were collected on average 80 days post-second  
195 immunization. Ad26.COV2.S-vaccinated sera were collected, on average, 82 days post-  
196 immunization (**Table S2**). Blood was drawn at the NYU Vaccine Center with written  
197 consent under IRB approved protocols (IRB 18-02035 and IRB 18-02037). REGN10933  
198 and REGN10987 were generated as previously described<sup>22</sup>.

199

200 **SARS-CoV-2 spike lentiviral pseudotypes**

201 Lentiviruses pseudotyped by variant SARS-CoV-2 spikes were produced as previously  
202 reported<sup>23</sup> and normalized for reverse transcriptase (RT) activity. Neutralization titers of  
203 sera, monoclonal antibody and soluble ACE2 (sACE2)<sup>24</sup> were determined as previously  
204 described<sup>23</sup>.

205

206 **sACE2 pull-down assay**

207 sACE2-bound-beads were mixed with pseudotyped virions as previously described<sup>24</sup>.  
208 The amount of virus bound was quantified by immunoblot analysis of bound p24.

209

210 **Statistical Analysis**

211 All experiments were in technical duplicates or triplicates. Statistical significance was  
212 determined by two-tailed, unpaired t-test with confidence intervals shown as the mean  $\pm$   
213 SD or SEM. (\* $P \leq 0.05$ , \*\* $P \leq 0.01$ , \*\*\* $P \leq 0.001$ , \*\*\*\* $P \leq 0.0001$ ). Spike protein structure  
214 (7BNM)<sup>25</sup> was downloaded from the Protein Data Bank.

215

## 216 **Acknowledgements**

217 The work was funded in part by grants from the NIH to N.R.L. (DA046100, AI122390 and  
218 AI120898) and to M.J.M. (UM1AI148574). T.T. was supported by the Vilcek/Goldfarb  
219 Fellowship Endowment Fund. M.J.M. and M.I.S. were partially supported by NYU  
220 Grossman SOM institutional support.

221

## 222 **Author contributions**

223 T.T. and N.R.L. designed the experiments. H.Z., T.T. and B.M.D. carried out the  
224 experiments and analyzed data. T.T., H.Z. and N.R.L. wrote the manuscript. M.I.S. and  
225 M.J.M. designed and supervised the specimen selection, clinical information collection  
226 and the N ELISAs, and provided key reagents and useful insights. All authors provided  
227 critical comments on manuscript.

228

## 229 **Declaration of Interests.**

230 The authors declare no competing interests except M.J.M. who received research  
231 grants from Lilly, Pfizer, and Sanofi, and serves on advisory boards for Pfizer and  
232 Meissa Vaccines

233

234 **Figure legends**

235

236 **Figure 1. Comparison of neutralization titers of variant spike protein pseudotyped**  
237 **viruses by convalescent sera, antibodies elicited by BNT162b2, mRNA-1273,**  
238 **Ad26.COVS2.S.**

239 (A) Neutralization of variant spike protein pseudotyped viruses by convalescent serum  
240 (n=8) (left). Neutralizing titers of serum samples from BNT162b2 vaccinated individuals  
241 (n=15) (middle). Neutralizing titers of serum samples from mRNA-1273 vaccinated  
242 donors (n=6) (right). The serum was collected at early time point (7 days after second  
243 immunization). The neutralization IC<sub>50</sub> from individual donors is shown. Significance is  
244 based on two-sided t-test.

245 (B) Comparison of neutralization of variants by convalescent serum (n=8, the same  
246 donors in A), BNT162b2 vaccinated individuals (n=9), mRNA-1273 vaccinated donors  
247 (n=8), Ad26.COVS2.S vaccinated donors (n=10), sera from vaccinated individuals were  
248 collected at later time points (90, 80, 82 days on average after last immunization of each  
249 vaccine, see the table S2) . Each line shows individual donors.

250 (C) Comparison of neutralization potency of each vaccine by different SARS-CoV-2  
251 variants. The neutralization IC<sub>50</sub> from individual donors vaccinated by BNT162b2 (yellow),  
252 mRNA-1273 (pink), Ad26.COVS2.S (black) is shown. Significance is based on two-sided  
253 t-test.

254

255 **Figure 2. Neutralization of variant spike protein pseudotyped viruses by**  
256 **monoclonal antibodies and sACE2.**

257 (A) Infectivity of virus pseudotyped by variant and D614G spike proteins. Viruses were  
258 normalized for RT activity and applied to target cells. Infectivity of viruses pseudotyped  
259 with the variant proteins or the individual Lambda mutations were tested on ACE2.293T.  
260 Luciferase activity was measured two days post-infection. Significance was based on two-  
261 sided t-test.

262 (B) Neutralization of variant spike protein variants by sACE2. Viruses pseudotyped with  
263 variant spike proteins were incubated with a serially diluted recombinant sACE2 and then  
264 applied to ACE2.293T cells. Each plot represents the percent infectivity of D614G and  
265 other mutated spike pseudotyped virus. The diagram shows the IC<sub>50</sub> for each curve.

266 (C) Nickel beads were coated for 1 hour with 1, 0.5 and 0.1  $\mu$ g of sACE2 proteins.  
267 Unbound protein was removed and SARS-CoV-2 variant pseudotyped virions (D614G,  
268 Delta, Lambda) were incubated with the beads. After 1 hour, the bound virions were  
269 analyzed on an immunoblot with antibody p24 antibody. Beads-bound p24 (ng) was  
270 calculated and indicated in the bottom (left). Input virions were analyzed on an  
271 immunoblot with anti-p24 antibody (middle). Input sACE2 proteins were analyzed on an  
272 immunoblot with anti-His-tag antibody (right).

273 (D) Neutralization of Beta, Delta, Delta plus and Lambda variant spike protein variants by  
274 REGN10933 and REGN10987 monoclonal antibodies. Neutralization of D614G and  
275 variant pseudotyped viruses by REGN10933 (left), REGN10987 (middle), and 1:1 ratio of  
276 REGN10933 and REGN10987 (right). The IC<sub>50</sub> values of REGN10933, REGN10987 and  
277 the cocktail is shown in the table.

278

279

280 **Supplemental Figure S1.**

281 **The structure of variant spikes and immunoblot analysis of spike proteins.**

282 (A) The domain structure of the SARS-CoV-2 spike is diagrammed with Delta (B.1.617.2),  
283 Delta plus (AY.1), Lambda (C.37) variant amino acid residues indicated. NTD, N-terminal  
284 domain; RBD, receptor-binding domain; RBM, receptor-binding motif; SD1 subdomain 1;  
285 SD2, subdomain 2; CS, cleavage site; FP, fusion peptide; HR1, heptad repeat 1; HR2,  
286 heptad repeat 2; TM, transmembrane region; IC, intracellular domain. Key mutations are  
287 shown in 3D structure (top view).

288 (B) Immunoblot analysis of the Delta (B.1.617.2), Delta plus (AY.1), single point mutated  
289 of Lambda (C.37) variant, Lambda (C.37) variant spike proteins in transfected 293T cells.  
290 Pseudotyped viruses were produced by transfection of 293T cells. Two days post-  
291 transfection, virions were analyzed on an immunoblot probed with anti-spike antibody and  
292 anti-HIV-1 p24. The cell lysates were probed with anti-spike antibody and anti-GAPDH  
293 antibodies as a loading control.

294

295 **Supplemental Figure S2.**

296 **Neutralization titers of spike protein pseudotyped viruses (single point mutations)**

297 **by convalescent sera, antibodies elicited by BNT162b2, mRNA-1273.**

298 (A) Neutralization of variant spike protein (single point mutations) pseudotyped viruses by  
299 convalescent serum (n=8). Dots represent the IC<sub>50</sub> of single donors.

300 (B) Neutralizing titers of serum samples from BNT162b2 vaccinated individuals (n=15).

301 The serum was collected at early time point (7 days after second immunization). Each dot  
302 represents the IC<sub>50</sub> for a single donor.



303 (C) Neutralizing titers of serum samples from mRNA-1273 vaccinated donors (n=6). The  
304 serum was collected at early time point (7 days after second immunization). The  
305 neutralization IC<sub>50</sub> from individual donors is shown. Significance is based on the two-sided  
306 t-test.

307

### 308 **Supplemental Figure S3.**

#### 309 **Neutralization titers of spike protein pseudotyped viruses (single point mutations)** 310 **by monoclonal antibodies.**

311 Neutralization of variant spike protein variants (single point mutations) by REGN10933  
312 and REGN10987 monoclonal antibodies. The IC<sub>50</sub> of REGN10933, REGN10987 and the  
313 cocktail is shown in the table.

314

## 315 References

- 316 1. Polack, F.P., *et al.* Safety and Efficacy of the BNT162b2 mRNA Covid-19 Vaccine.  
317 *New England Journal of Medicine* **383**, 2603-2615 (2020).
- 318 2. Sadoff, J., *et al.* Safety and Efficacy of Single-Dose Ad26.COV2.S Vaccine against  
319 Covid-19. *New England Journal of Medicine* **384**, 2187-2201 (2021).
- 320 3. World Health Organization. (2021).
- 321 4. Garcia-Beltran, W.F., *et al.* Multiple SARS-CoV-2 variants escape neutralization  
322 by vaccine-induced humoral immunity. *Cell* (2021).
- 323 5. Tada, T., *et al.* Convalescent-Phase Sera and Vaccine-Elicited Antibodies Largely  
324 Maintain Neutralizing Titer against Global SARS-CoV-2 Variant Spikes. *mBio* **12**,  
325 e0069621 (2021).
- 326 6. Wang, P., *et al.* Antibody resistance of SARS-CoV-2 variants B.1.351 and B.1.1.7.  
327 *Nature* (2021).
- 328 7. Wu, K., *et al.* Serum Neutralizing Activity Elicited by mRNA-1273 Vaccine. *New*  
329 *England Journal of Medicine* **384**, 1468-1470 (2021).
- 330 8. Xie, X., *et al.* Neutralization of SARS-CoV-2 spike 69/70 deletion, E484K and  
331 N501Y variants by BNT162b2 vaccine-elicited sera. *Nature Medicine* **27**, 620-621  
332 (2021).
- 333 9. Liu, J., *et al.* BNT162b2-elicited neutralization of B.1.617 and other SARS-CoV-2  
334 variants. *Nature* (2021).
- 335 10. Choi, A., *et al.* Serum Neutralizing Activity of mRNA-1273 against SARS-CoV-2  
336 Variants. *bioRxiv*, 2021.2006.2028.449914 (2021).

- 337 11. Planas, D., *et al.* Reduced sensitivity of infectious SARS-CoV-2 variant B.1.617.2  
338 to monoclonal antibodies and sera from convalescent and vaccinated individuals.  
339 *bioRxiv*, 2021.2005.2026.445838 (2021).
- 340 12. Noval, M.G., *et al.* Antibody isotype diversity against SARS-CoV-2 is associated  
341 with differential serum neutralization capacities. *Scientific Reports* **11**, 5538 (2021).
- 342 13. Gu, H., *et al.* Adaptation of SARS-CoV-2 in BALB/c mice for testing vaccine  
343 efficacy. *Science* **369**, 1603-1607 (2020).
- 344 14. Starr, T.N., *et al.* Deep Mutational Scanning of SARS-CoV-2 Receptor Binding  
345 Domain Reveals Constraints on Folding and ACE2 Binding. *Cell* **182**, 1295-1310  
346 e1220 (2020).
- 347 15. Khoury, D.S., *et al.* Neutralizing antibody levels are highly predictive of immune  
348 protection from symptomatic SARS-CoV-2 infection. *Nature Medicine* **27**, 1205-  
349 1211 (2021).
- 350 16. Jongeneelen, M., *et al.* Ad26.COVS elicited neutralizing activity against Delta  
351 and other SARS-CoV-2 variants of concern. *bioRxiv*, 2021.2007.2001.450707  
352 (2021).
- 353 17. Barouch, D.H., *et al.* Durable Humoral and Cellular Immune Responses Following  
354 Ad26.COVS Vaccination for COVID-19. *medRxiv*, 2021.2007.2005.21259918  
355 (2021).
- 356 18. Alter, G., *et al.* Immunogenicity of Ad26.COVS vaccine against SARS-CoV-2  
357 variants in humans. *Nature* (2021).
- 358 19. Tenbusch, M., *et al.* Heterologous prime-boost vaccination with ChAdOx1 nCoV-  
359 19 and BNT162b2 mRNA. *medRxiv*, 2021.2007.2003.21258887 (2021).

- 360 20. Gross, R., *et al.* Heterologous ChAdOx1 nCoV-19 and BNT162b2 prime-boost  
361 vaccination elicits potent neutralizing antibody responses and T cell reactivity.  
362 *medRxiv*, 2021.2005.2030.21257971 (2021).
- 363 21. Barros-Martins, J., *et al.* Immune responses against SARS-CoV-2 variants after  
364 heterologous and homologous ChAdOx1 nCoV-19/BNT162b2 vaccination. *Nature*  
365 *Medicine* (2021).
- 366 22. Tada, T., *et al.* Decreased neutralization of SARS-CoV-2 global variants by  
367 therapeutic anti-spike protein monoclonal antibodies. *bioRxiv*,  
368 2021.2002.2018.431897 (2021).
- 369 23. Tada, T., *et al.* Neutralization of viruses with European, South African, and United  
370 States SARS-CoV-2 variant spike proteins by convalescent sera and BNT162b2  
371 mRNA vaccine-elicited antibodies. *bioRxiv*, 2021.2002.2005.430003 (2021).
- 372 24. Tada, T., *et al.* An ACE2 Microbody Containing a Single Immunoglobulin Fc  
373 Domain Is a Potent Inhibitor of SARS-CoV-2. *Cell Rep* **33**, 108528 (2020).
- 374 25. Benton, D.J., *et al.* The effect of the D614G substitution on the structure of the  
375 spike glycoprotein of SARS-CoV-2. *Proc Natl Acad Sci U S A* **118**(2021).
- 376



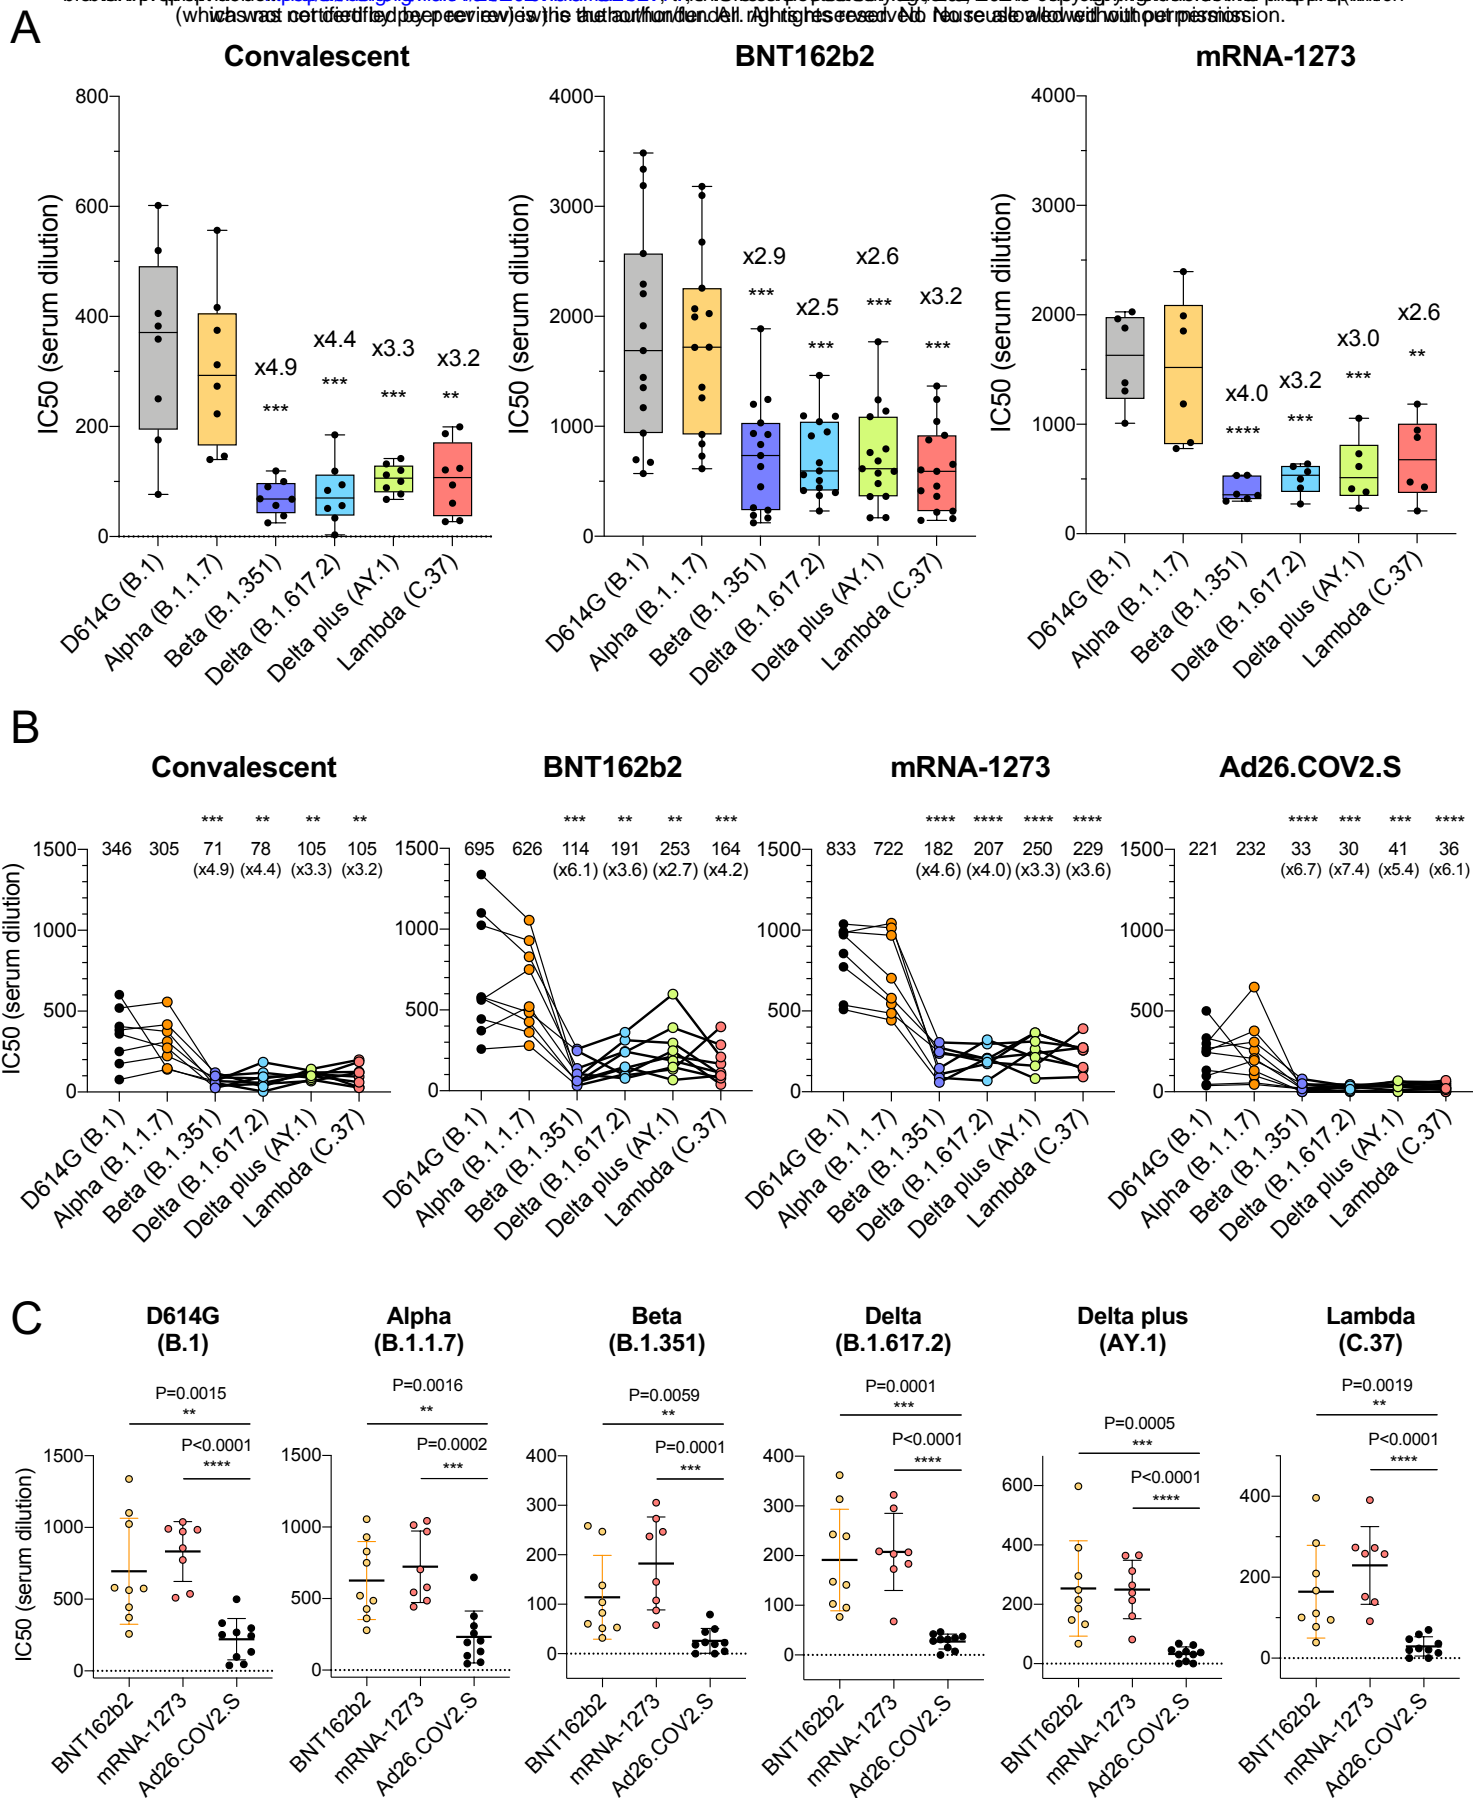

**Figure 1**

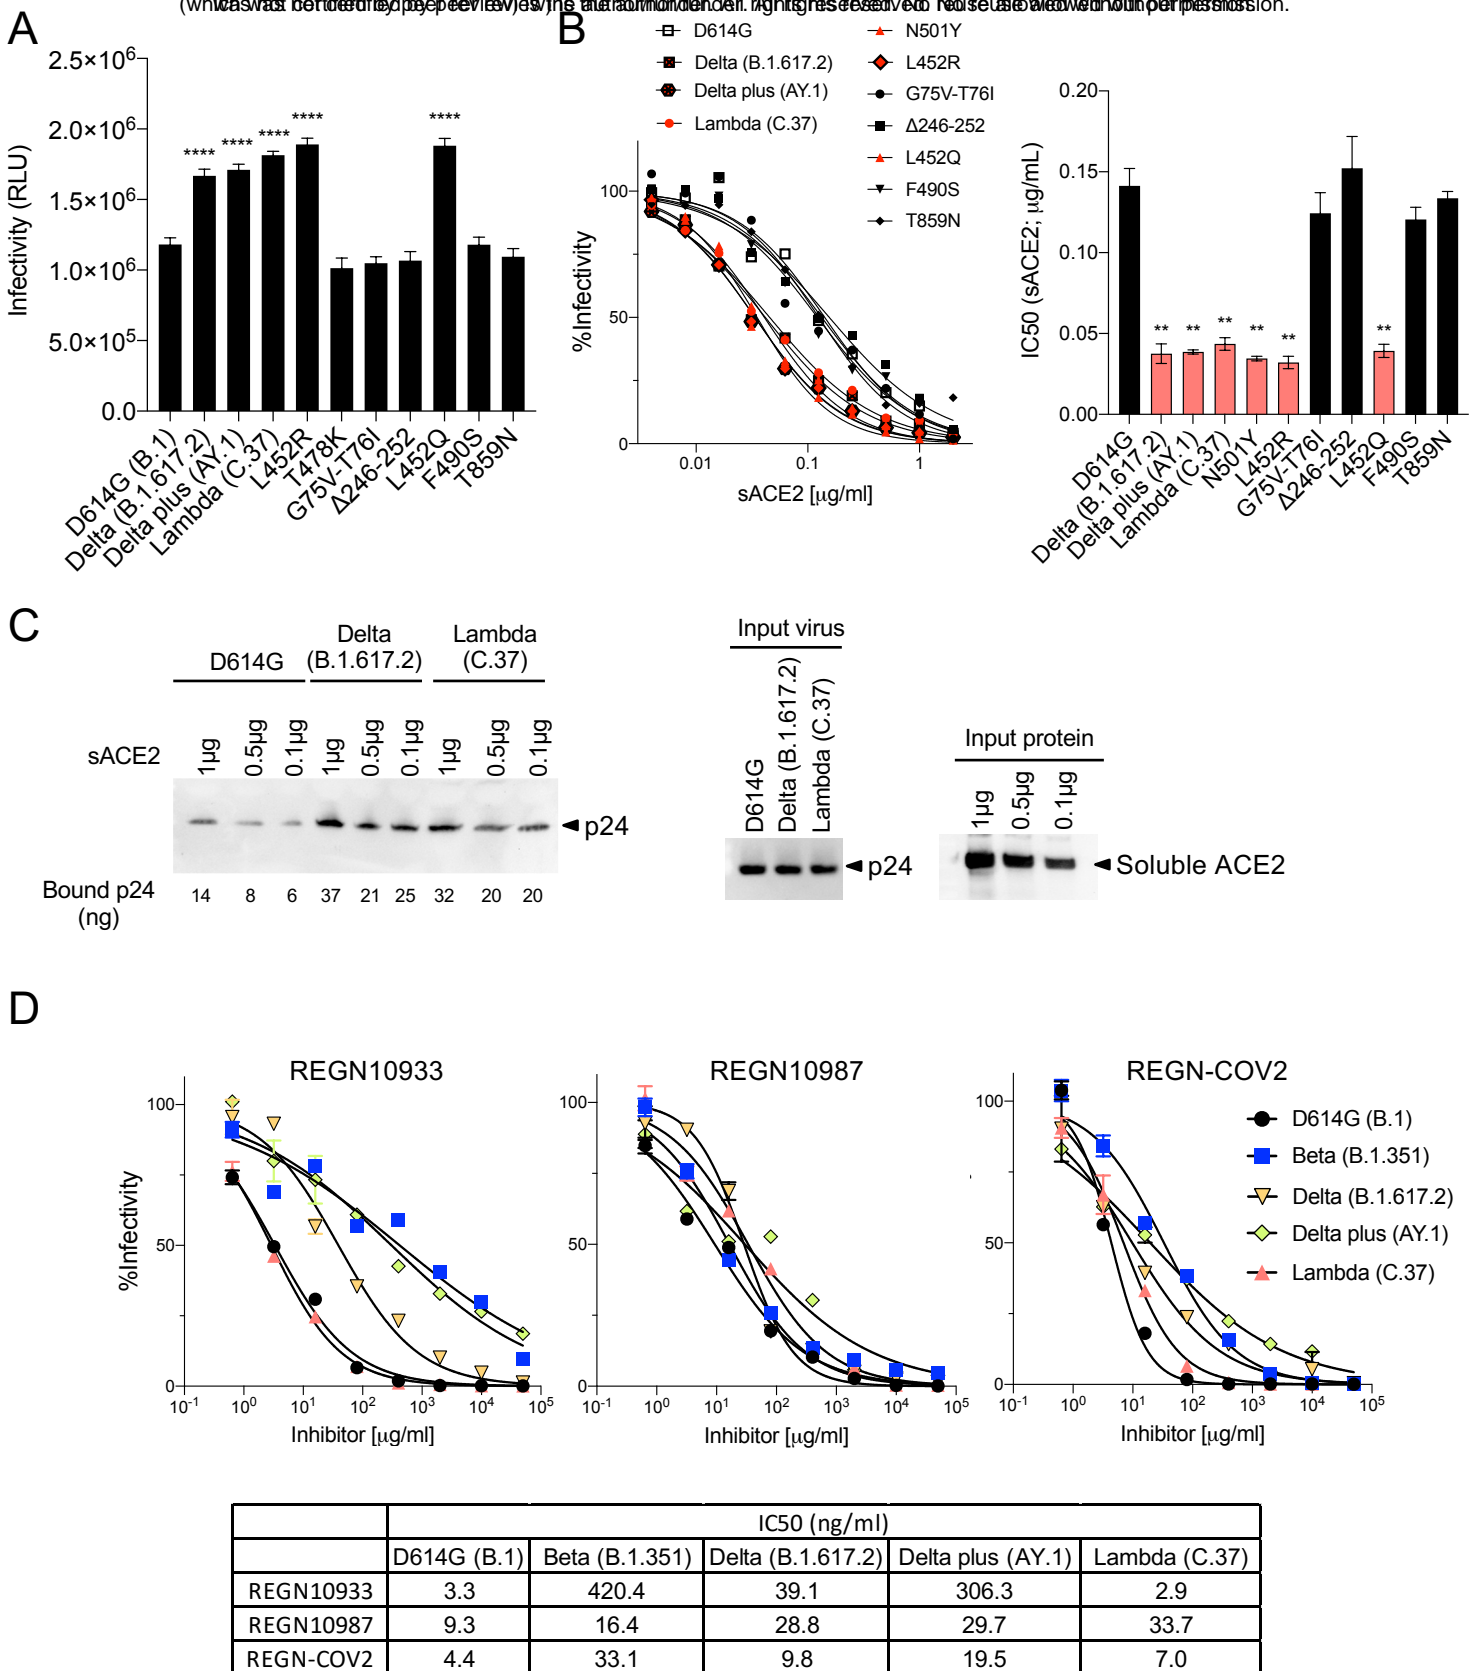

Figure 2

**A**

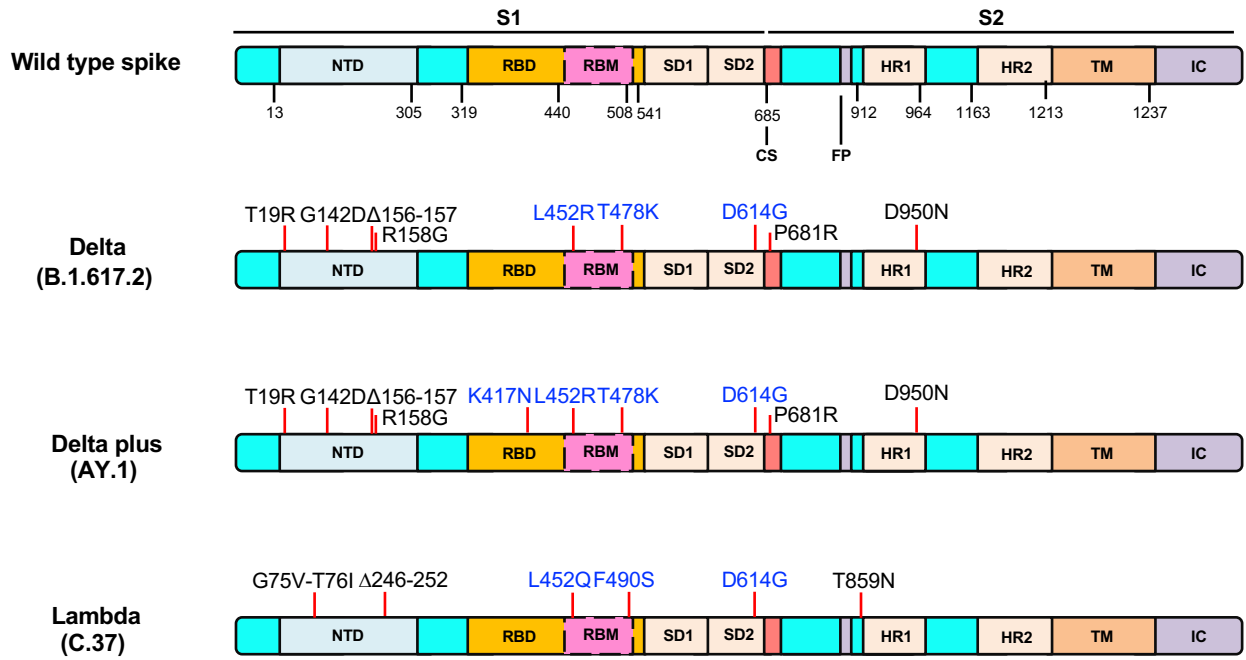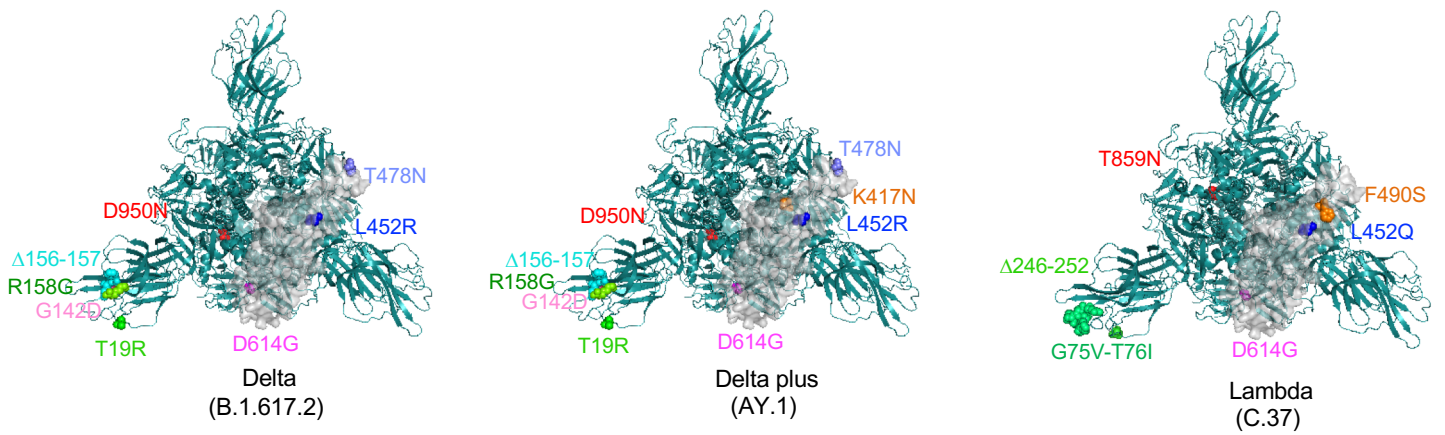

**B**

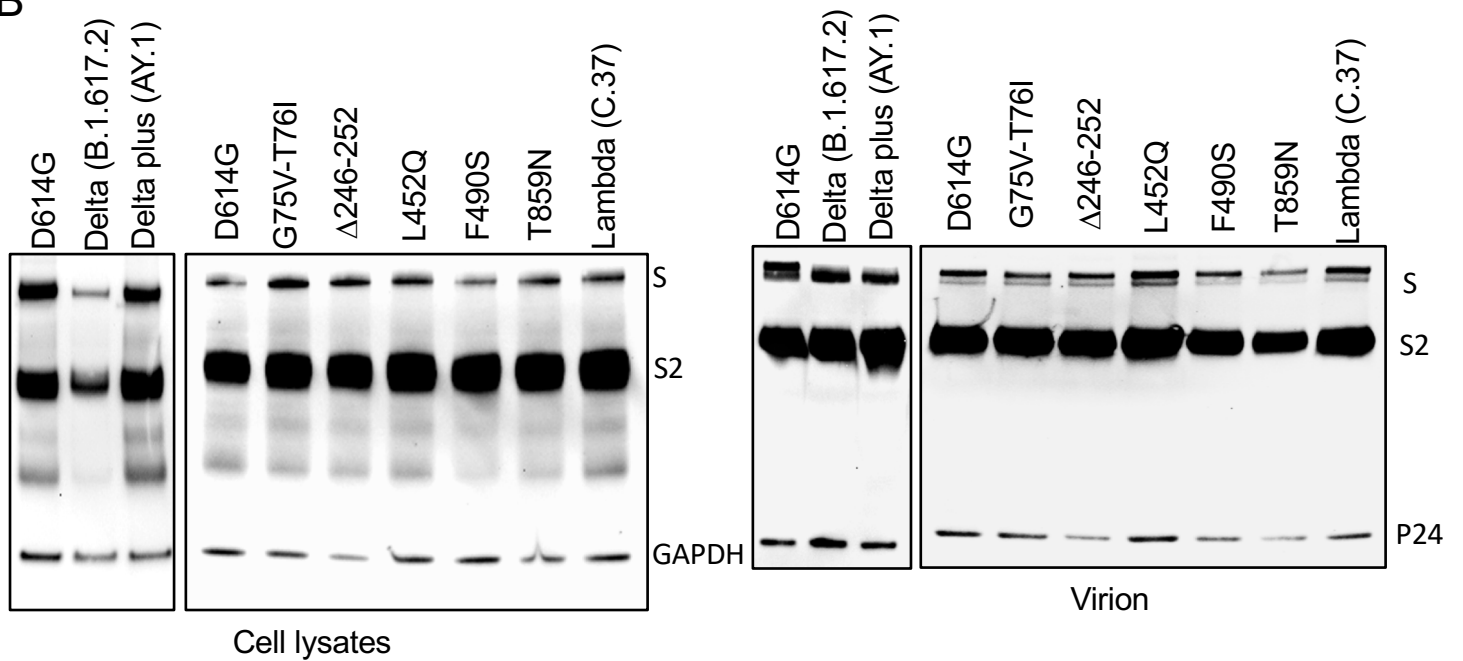



**A**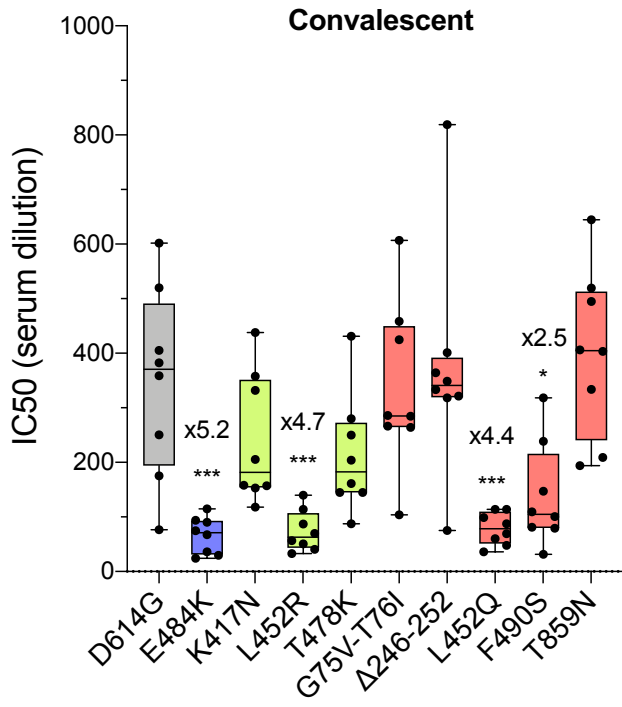**B**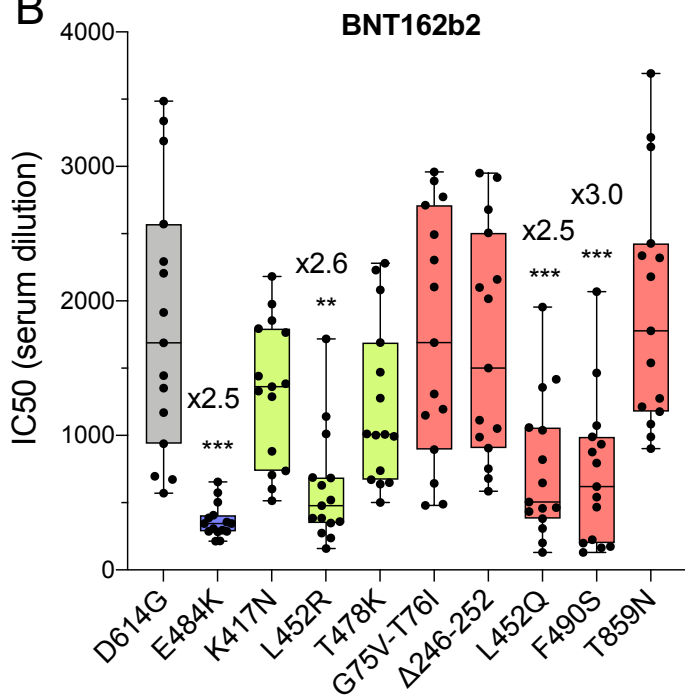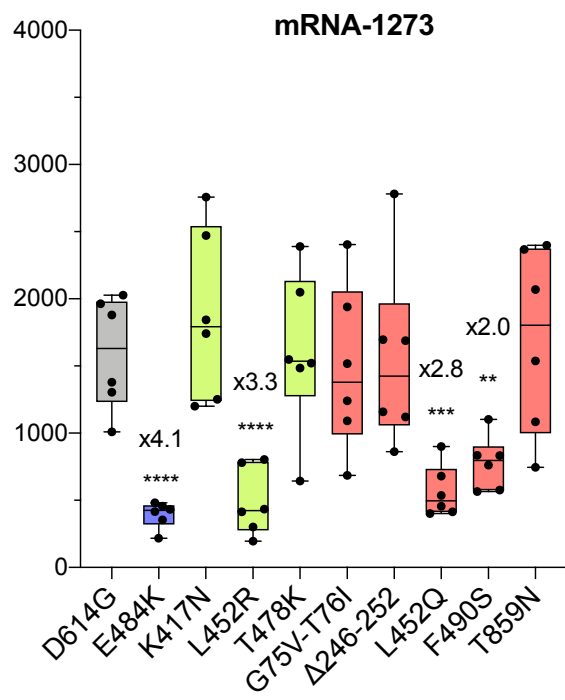

A

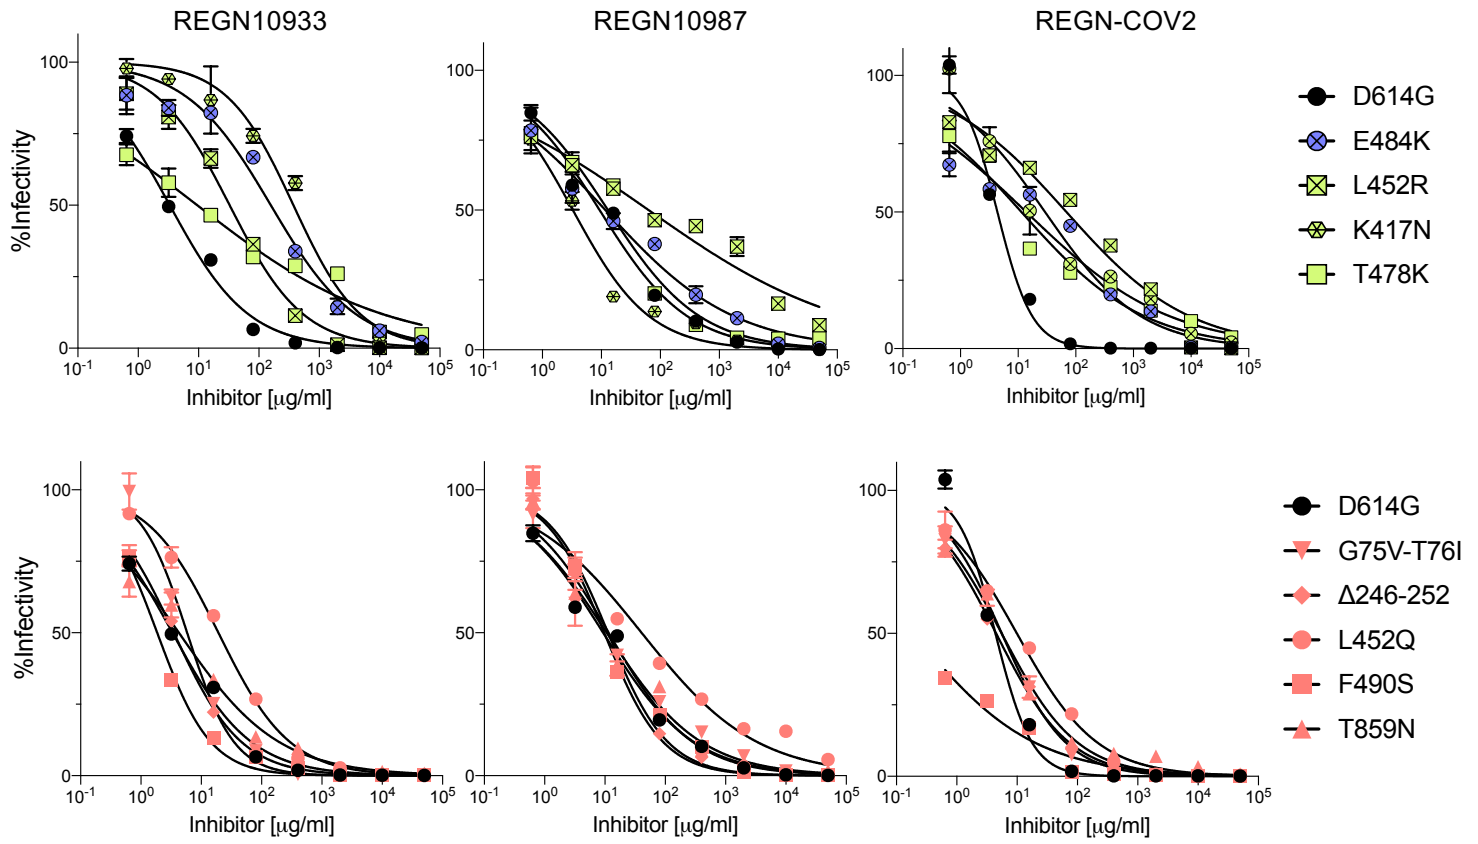

|           | IC50 (ng/ml) |           |          |       |       |       |       |       |       |       |
|-----------|--------------|-----------|----------|-------|-------|-------|-------|-------|-------|-------|
|           | D614G        | G75V-T76I | Δ246-252 | L452Q | F490S | T859N | E484K | L452R | K417N | T478K |
| REGN10933 | 3.3          | 5.8       | 3.5      | 19.3  | 1.9   | 4.3   | 157.6 | 32.7  | 373.3 | 9.5   |
| REGN10987 | 9.3          | 10.7      | 9.7      | 40.5  | 11.2  | 11.5  | 11.7  | 63.3  | 3.3   | 13.0  |
| REGN-COV2 | 4.4          | 5.6       | 4.5      | 9.9   | 0.2   | 5.5   | 13.9  | 69.0  | 29.3  | 11.4  |

**Table S1.** Neutralization of variants by convalescent sera, BNT162b2 and mRNA-1273 elicited antibodies  
7 days post-second vaccination.

|              | <b>Convalescent</b>               |                    |                   |                      |                      |                  |
|--------------|-----------------------------------|--------------------|-------------------|----------------------|----------------------|------------------|
|              | IC <sub>50</sub> (serum dilution) |                    |                   |                      |                      |                  |
| donor        | D614G<br>(B.1)                    | Alpha<br>(B.1.1.7) | Beta<br>(B.1.351) | Delta<br>(B.1.617.2) | Delta plus<br>(AY.1) | Lambda<br>(C.37) |
| 1            | 251                               | 312                | 69                | 56                   | 112                  | 94               |
| 2            | 176                               | 223                | 91                | 84                   | 121                  | 124              |
| 3            | 77                                | 140                | 68                | 185                  | 132                  | 29               |
| 4            | 406                               | 375                | 38                | 51                   | 68                   | 121              |
| 5            | 602                               | 146                | 57                | 3                    | 77                   | 27               |
| 6            | 383                               | 416                | 119               | 34                   | 142                  | 199              |
| 7            | 520                               | 556                | 100               | 119                  | 89                   | 187              |
| 8            | 359                               | 273                | 25                | 94                   | 100                  | 61               |
| Mean<br>(SD) | 346<br>(174)                      | 305<br>(142)       | 71<br>(32)        | 78<br>(56)           | 105<br>(26)          | 105<br>(66)      |

|           |                        | <b>BNT162b2</b>                   |                 |                |                   |                   |               |
|-----------|------------------------|-----------------------------------|-----------------|----------------|-------------------|-------------------|---------------|
|           |                        | IC <sub>50</sub> (serum dilution) |                 |                |                   |                   |               |
| donor     | Days post last vaccine | D614G (B.1)                       | Alpha (B.1.1.7) | Beta (B.1.351) | Delta (B.1.617.2) | Delta plus (AY.1) | Lambda (C.37) |
| 1         | 7                      | 1915                              | 1994            | 877            | 914               | 575               | 834           |
| 2         | 7                      | 697                               | 615             | 228            | 231               | 169               | 191           |
| 3         | 7                      | 2572                              | 2026            | 1366           | 950               | 1088              | 1244          |
| 4         | 7                      | 939                               | 925             | 145            | 507               | 171               | 123           |
| 5         | 7                      | 1445                              | 1717            | 161            | 416               | 361               | 167           |
| 6         | 7                      | 2205                              | 2069            | 413            | 370               | 614               | 935           |
| 7         | 7                      | 1689                              | 1259            | 918            | 560               | 1769              | 735           |
| 8         | 7                      | 3189                              | 2676            | 1045           | 1095              | 762               | 1032          |
| 9         | 7                      | 1352                              | 1720            | 456            | 594               | 363               | 451           |
| 10        | 7                      | 1170                              | 1355            | 604            | 669               | 796               | 635           |
| 11        | 7                      | 672                               | 729             | 219            | 398               | 592               | 238           |
| 12        | 7                      | 571                               | 841             | 364            | 441               | 480               | 259           |
| 13        | 7                      | 3338                              | 3099            | 1245           | 1463              | 1241              | 926           |
| 14        | 7                      | 3486                              | 3181            | 591            | 1042              | 685               | 1200          |
| 15        | 7                      | 2294                              | 2257            | 654            | 1092              | 1138              | 1888          |
| Mean (SD) |                        | 1835 (986)                        | 1764 (822)      | 619 (394)      | 716 (354)         | 720 (436)         | 724 (502)     |

|           |                        | <b>mRNA-1273</b>                  |                 |                |                   |                   |               |
|-----------|------------------------|-----------------------------------|-----------------|----------------|-------------------|-------------------|---------------|
|           |                        | IC <sub>50</sub> (serum dilution) |                 |                |                   |                   |               |
| donor     | Days post last vaccine | D614G (B.1)                       | Alpha (B.1.1.7) | Beta (B.1.351) | Delta (B.1.617.2) | Delta plus (AY.1) | Lambda (C.37) |
| 1         | 7                      | 1380                              | 1186            | 532            | 500               | 382               | 472           |
| 2         | 7                      | 1963                              | 1852            | 362            | 614               | 731               | 1185          |
| 3         | 7                      | 1010                              | 833             | 351            | 273               | 1055              | 209           |
| 4         | 7                      | 1305                              | 779             | 298            | 419               | 234               | 427           |
| 5         | 7                      | 1879                              | 2395            | 535            | 638               | 411               | 880           |
| 6         | 7                      | 2028                              | 1990            | 322            | 568               | 615               | 946           |
| Mean (SD) |                        | 1594 (419)                        | 1506 (668)      | 400 (106)      | 502 (138)         | 571 (296)         | 687 (373)     |

**Table S2.** Neutralization of viruses by sera from BNT162b2, mRNA-1273 and Ad26.COVS vaccinated individuals.

| <b>BNT162b2</b> |                        |              |     |     |                           |                                   |           |          |           |            |           |
|-----------------|------------------------|--------------|-----|-----|---------------------------|-----------------------------------|-----------|----------|-----------|------------|-----------|
| donor           | Days post last vaccine | Anti-N ELISA | Age | Sex | Comorbidities             | IC <sub>50</sub> (serum dilution) |           |          |           |            |           |
|                 |                        |              |     |     |                           | D614G                             | Alpha     | Beta     | Delta     | Delta plus | Lambda    |
| 1               | 84                     | -            | 39  | F   | None                      | 575                               | 427       | 51       | 141       | 215        | 167       |
| 2               | 52                     | -            | 23  | F   | None                      | 1338                              | 1055      | 82       | 314       | 296        | 101       |
| 3               | 101                    | -            | 26  | F   | Asthma                    | 1101                              | 829       | 258      | 362       | 598        | 209       |
| 4               | 109                    | -            | 33  | F   | None                      | 562                               | 750       | 138      | 243       | 186        | 111       |
| 5               | 60                     | -            | 35  | F   | Hypothyroidism, Psoriasis | 1024                              | 930       | 53       | 239       | 391        | 284       |
| 6               | 81                     | -            | 42  | F   | Asthma                    | 258                               | 279       | 32       | 103       | 248        | 39        |
| 7               | 108                    | -            | 26  | F   | None                      | 580                               | 485       | 247      | 95        | 133        | 396       |
| 8               | 107                    | -            | 24  | M   | None                      | 372                               | 520       | 104      | 77        | 147        | 78        |
| 9               | 110                    | -            | 35  | M   | None                      | 445                               | 362       | 60       | 148       | 67         | 95        |
| Mean (SD)       | 90 (22)                |              | 31  |     |                           | 695 (369)                         | 626 (272) | 114 (85) | 191 (102) | 253 (161)  | 164 (114) |

| <b>mRNA-1273</b> |                        |              |     |     |               |                                   |           |          |          |            |          |
|------------------|------------------------|--------------|-----|-----|---------------|-----------------------------------|-----------|----------|----------|------------|----------|
| donor            | Days post last vaccine | Anti-N ELISA | Age | Sex | Comorbidities | IC <sub>50</sub> (serum dilution) |           |          |          |            |          |
|                  |                        |              |     |     |               | D614G                             | Alpha     | Beta     | Delta    | Delta plus | Lambda   |
| 1                | 89                     | -            | 26  | M   | None          | 984                               | 1043      | 108      | 173      | 364        | 257      |
| 2                | 92                     | -            | 53  | M   | None          | 972                               | 703       | 237      | 207      | 239        | 273      |
| 3                | 61                     | -            | 67  | M   | Prediabetes   | 774                               | 544       | 87       | 68       | 264        | 139      |
| 4                | 93                     | -            | 33  | F   | None          | 509                               | 443       | 58       | 209      | 82         | 91       |
| 5                | 44                     | -            | 32  | M   | None          | 856                               | 579       | 273      | 203      | 365        | 258      |
| 6                | 100                    | -            | 29  | F   | None          | 1038                              | 1014      | 305      | 295      | 312        | 274      |
| 7                | 52                     | -            | 33  | F   | None          | 990                               | 968       | 145      | 322      | 213        | 152      |
| 8                | 105                    | -            | 55  | F   | Asthma        | 537                               | 485       | 246      | 184      | 160        | 391      |
| Mean (SD)        | 80 (24)                |              | 41  |     |               | 833 (209)                         | 722 (249) | 182 (94) | 208 (77) | 250 (99)   | 229 (96) |

| <b>Ad26.COVS</b> |                        |              |     |     |               |                                   |           |         |         |            |         |
|------------------|------------------------|--------------|-----|-----|---------------|-----------------------------------|-----------|---------|---------|------------|---------|
| donor            | Days post last vaccine | Anti-N ELISA | Age | Sex | Comorbidities | IC <sub>50</sub> (serum dilution) |           |         |         |            |         |
|                  |                        |              |     |     |               | D614G                             | Alpha     | Beta    | Delta   | Delta plus | Lambda  |
| 1                | 57                     | -            | 42  | F   | None          | 46                                | 55        | 22      | 31      | 41         | 21      |
| 2                | 58                     | -            | 28  | F   | None          | 133                               | 101       | 5       | 28      | 46         | 47      |
| 3                | 66                     | -            | 36  | F   | None          | 500                               | 130       | ND      | ND      | ND         | ND      |
| 4                | 92                     | -            | 33  | F   | None          | 333                               | 257       | 23      | 31      | 8          | 24      |
| 5                | 87                     | -            | 39  | F   | Prediabetes   | 244                               | 205       | 19      | 42      | 31         | 36      |
| 6                | 72                     | -            | 32  | M   | None          | 268                               | 308       | 79      | 34      | 63         | 59      |
| 7                | 92                     | -            | 39  | F   | None          | 251                               | 377       | 44      | 46      | 38         | 70      |
| 8                | 71                     | -            | 75  | F   | None          | 298                               | 648       | ND      | 7       | ND         | ND      |
| 9                | 105                    | -            | 30  | M   | None          | 38                                | 45        | 18      | 37      | 31         | 13      |
| 10               | 115                    | -            | 33  | F   | None          | 98                                | 194       | 50      | 15      | 68         | 20      |
| Mean (SD)        | 82 (20)                |              | 39  |     |               | 221 (144)                         | 232 (182) | 33 (24) | 30 (12) | 41 (19)    | 36 (21) |
